# Supplementary material for: Computational study of khellin excited states and photobinding to DNA
Source: Royal Society of Chemistry journal article supplement (doi:10.1039/b905147c), 2009-07-06

## **SUPPORTING MATERIAL**

# **COMPUTATIONAL STUDY OF KHELLIN EXCITED STATES AND PHOTOBINDING TO DNA**

**Salama Omar and Leif A. Eriksson**

*Örebro Life Science Center, School of Science and Technology, Örebro University  
701 82 Örebro, Sweden*

**Figure S1.** Energy curves for ground and first excited singlet states for Khellin addition to thymine at (a) Pyrone side, (b) furan side. Plots shown for B3LYP and MPWB1K functionals, using the 6-31G(d,p) basis set; all calculations single point TD-DFT based on B3LYP optimized geometries as outlined in text.

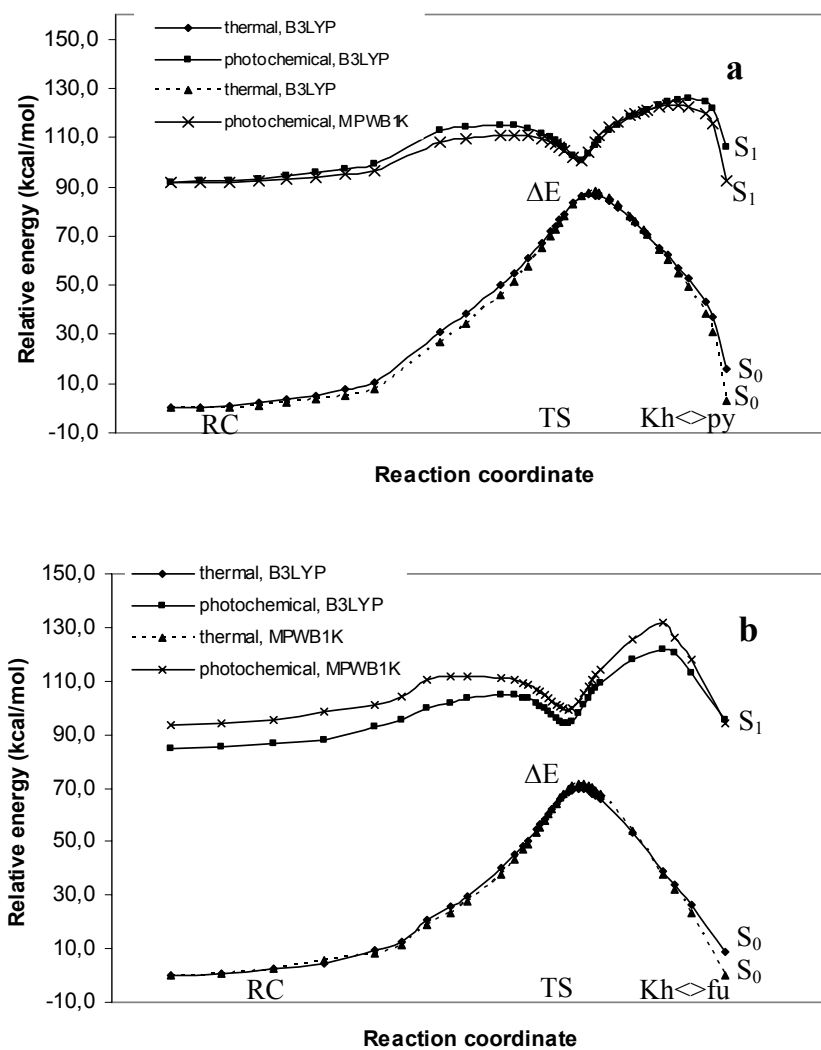

Supplement: b905147c.pdf [file b905147c.pdf]
